# Supplementary material for: Comprehensive Analysis of Prevalence, Epidemiologic Characteristics, and Clinical Characteristics of Monoinfection and Coinfection in Diarrheal Diseases in Children in Tanzania
Source: PubMed Central journal article supplement — Am J Epidemiol. 2017 May 24;186(9):1074–83. doi: 10.1093/aje/kwx173 (PMC5860328; doi:10.1093/aje/kwx173), 2017-05-24
Supplement: kwx173_moyowebmaterialfinal.pdf [file kwx173_moyowebmaterialfinal.pdf]

## Web Appendix 1: Sample Calculations

### 1. Additive Interaction Model

```
. ic casectr RforG GforR age sex, rrbby(or)
```

| Summary measures | Estimates | P-value | Lower bound | Upper bound |
|------------------|-----------|---------|-------------|-------------|
| RforG_NOT_GforR  | 3.7998    | 0.0000  | 2.1482      | 6.7210      |
| GforR_NOT_RforG  | 0.0783    | 0.0150  | 0.0101      | 0.6103      |
| RforG_AND_GforR  | 7.1160    | 0.0656  | 0.8814      | 57.4527     |
| RERI             | 4.2379    | 0.5797  | -10.7607    | 19.2366     |
| AP               | 0.5955    | 0.1923  | -0.2998     | 1.4909      |
| S                | 3.2565    | 0.3881  | 0.2230      | 47.5469     |

Interaction exists if RERI != 0 or AP != 0 or S != 1

Command in STATA is IC casectr RforG GforR age sex, rrbby(or)

Casectr is case and control variable

Rfor G is a variable containing rotavirus positive, single or in combination with giardia only

GforR is a variable containing Giardia positive, single or in combination with rotavirus only

Age is age as a continuous variable

Sex is a sex variable

From the table

RERI is relative excessive risk ratio

AP is Attributable Proportion

## 2. Multiplicative Interaction Model

```
. logit casectr i.RforG##i.GforR age sex, or
```

```
Iteration 0: log likelihood = -882.2336
Iteration 1: log likelihood = -854.22251
Iteration 2: log likelihood = -853.90422
Iteration 3: log likelihood = -853.90234
Iteration 4: log likelihood = -853.90234
```

```
Logistic regression              Number of obs   =       1,287
                                LR chi2(5)       =         56.66
                                Prob > chi2         =         0.0000
Log likelihood = -853.90234      Pseudo R2      =         0.0321
```

| casectr                                   | Odds Ratio | Std. Err. | z     | P> z  | [95% Conf. Interval] |          |
|-------------------------------------------|------------|-----------|-------|-------|----------------------|----------|
| RforG                                     |            |           |       |       |                      |          |
| absence of rotavirus                      | 1          | (base)    |       |       |                      |          |
| presence of rotavirus                     | 3.799774   | 1.105636  | 4.59  | 0.000 | 2.148227             | 6.721022 |
| GforR                                     |            |           |       |       |                      |          |
| absence of giardia                        | 1          | (base)    |       |       |                      |          |
| presence of giradia                       | .0783328   | .0820526  | -2.43 | 0.015 | .0100536             | .6103323 |
| RforG#GforR                               |            |           |       |       |                      |          |
| presence of rotavirus#presence of giradia | 23.90761   | 36.3357   | 2.09  | 0.037 | 1.21576              | 470.1373 |
| age                                       | .9748801   | .0099438  | -2.49 | 0.013 | .9555842             | .9945656 |
| sex                                       | .7706528   | .0894285  | -2.25 | 0.025 | .6138795             | .967463  |
| _cons                                     | 2.261944   | .4667746  | 3.96  | 0.000 | 1.509482             | 3.3895   |

The command in STATA is `logit casectr i.RforG##i.GforR age sex, or`

Casectr is case and control variable

Rfor G is a variable containing rotavirus positive, single or in combination with giardia only

GforR is a variable containing Giardia positive, single or in combination with rotavirus only

Age is age as a continuous variable

Sex is a sex variable

From the table above multiplicative interaction value (95%CI) is 23.90 (1.21, 470.14)

### 3. A) Regression model to obtain OR for AF estimation for age ages

```
. logistic casectr Rotavirus2 Norovirus2 Crypto2 bfpA2 Sth2 Shigella2 Salmo2 age sex, vce (robust)
```

```
Logistic regression           Number of obs   =    1,287
                             Wald chi2(9)      =    218.83
                             Prob > chi2         =    0.0000
Log pseudolikelihood = -716.56494   Pseudo R2      =    0.1878
```

| casectr    | Robust     |           | z     | P> z  | [95% Conf. Interval] |          |
|------------|------------|-----------|-------|-------|----------------------|----------|
|            | Odds Ratio | Std. Err. |       |       |                      |          |
| Rotavirus2 | 8.291716   | 1.607454  | 10.91 | 0.000 | 5.670589             | 12.12441 |
| Norovirus2 | 4.791897   | 1.031974  | 7.28  | 0.000 | 3.141914             | 7.308372 |
| Crypto2    | 9.571388   | 2.672242  | 8.09  | 0.000 | 5.537674             | 16.54331 |
| bfpA2      | 2.597965   | 1.033279  | 2.40  | 0.016 | 1.191483             | 5.664721 |
| Sth2       | 4.315598   | 1.427866  | 4.42  | 0.000 | 2.256374             | 8.254122 |
| Shigella2  | 5.997339   | 2.163272  | 4.97  | 0.000 | 2.957506             | 12.16162 |
| Salmo2     | 4.163688   | 3.137071  | 1.89  | 0.058 | .950939              | 18.23071 |
| age        | .9777293   | .0111309  | -1.98 | 0.048 | .9561547             | .9997907 |
| sex        | .7532739   | .097687   | -2.18 | 0.029 | .5842064             | .971269  |
| _cons      | .9439911   | .2188963  | -0.25 | 0.804 | .5992224             | 1.487126 |

This the regression model you need to run before running specific command to obtain AF for each variable

The command in STATA is:

```
logistic casectr Rotavirus2 Norovirus2 Crypto2 bfpA2 Sth2 Shigella2 Salmo2 age sex, vce (robust)
```

#### From the model above

Caectr is a case and control variable

Rotavirus2, Norovirus2, Crypto2, bfpA2, sth2, Shigella2, Salmo2, are the variables of pathogens included in the model

Rotavirus2 is a variable containing rotavirus positive in cases and control

Norovirus2 is a variable containing norovirus positive in cases and control

Crypto2 is a variable containing cryptosporidium positive in cases and control

bfpA2 is a variable containing Typical EPEC positive in cases and control

sth2 is a variable containing STh-EPEC positive in cases and control

Shigella2 is a variable containing Shigella spp./EIEC positive in cases and control

Salmo2 is a variable containing Salmonella spp. positive in cases and control

## 2 (B) e.g. AF for rotavirus for all ages

```
. punafcc, at (Rotavirus2=0) eform vce (unconditional)
Scenario 0: (asobserved) _all
Scenario 1: Rotavirus2=0
Confidence interval for the population unattributable fraction (PUF)
Total number of observations used: 1287
```

|     | Ratio    | Std. Err. | z      | P> z  | [95% Conf. Interval] |          |
|-----|----------|-----------|--------|-------|----------------------|----------|
| PUF | .7275448 | .0193043  | -11.99 | 0.000 | .6906761             | .7663816 |

```
95% CI for the population attributable fraction (PAF)
```

|     | Estimate | Minimum  | Maximum  |
|-----|----------|----------|----------|
| PAF | .2724552 | .2336184 | .3093239 |

This is the model to obtain AF for individual pathogen using OR from 2(A) above

The command in STATA is punafcc, at (Rotavirus2=0) eform vce (unconditional)

From the calculations above AF (95% CI) is 27.24 (23.36, 30.93)

Web Table 1. Demographic and Clinical Characteristics of the Study Population (N=723 and 564 in the Cases and Controls respectively, in Tanzania, 2010-2011

| Characteristic                                 | Cases |      | Controls |      |
|------------------------------------------------|-------|------|----------|------|
|                                                | n     | %    | n        | %    |
| <b>Sex</b>                                     |       |      |          |      |
| Male                                           | 444   | 61.4 | 308      | 54.6 |
| Female                                         | 279   | 38.6 | 256      | 45.4 |
| <b>Age groups</b>                              |       |      |          |      |
| 0-11 months                                    | 500   | 69.2 | 291      | 51.6 |
| >11 to 24 months                               | 223   | 30.8 | 273      | 48.4 |
| <b>Malnutrition (WAZ)</b>                      |       |      |          |      |
| Normal                                         | 307   | 42.5 | 342      | 60.6 |
| Underweight                                    | 416   | 57.5 | 222      | 39.4 |
| <b>Malnutrition (LAZ)</b>                      |       |      |          |      |
| Normal                                         | 233   | 32.2 | 257      | 45.6 |
| Stunted                                        | 490   | 67.8 | 307      | 54.4 |
| <b>Malnutrition (WLZ)</b>                      |       |      |          |      |
| Normal                                         | 505   | 69.8 | 447      | 79.3 |
| Wasted                                         | 218   | 30.2 | 117      | 20.7 |
| <b>HIV test results (n=426)</b>                |       |      |          |      |
| HIV negative (n=391)                           | 79    | 75.2 | 312      | 97.8 |
| HIV positive (n=33)                            | 26    | 24.8 | 7        | 2.2  |
| <b>Breast feeding (aged 7-12 months)</b>       |       |      |          |      |
| Breast fed (n=375)                             | 230   | 81.6 | 145      | 71.4 |
| Not breast fed (n=110)                         | 52    | 18.4 | 58       | 28.6 |
| <b>Type of diarrhoea</b>                       |       |      |          |      |
| Acute diarrhoea                                | 644   | 89.1 | N/A      | N/A  |
| Persistent diarrhoea                           | 79    | 10.9 | N/A      | N/A  |
| <b>Presence of blood in stool (dysentery )</b> |       |      |          |      |
| Yes                                            | 30    | 4.1  | N/A      | N/A  |
| No                                             | 693   | 95.9 | N/A      | N/A  |
| <b>Hydration status</b>                        |       |      |          |      |
| Non to moderate dehydration                    | 559   | 77.3 | N/A      | N/A  |
| Severe dehydration                             | 164   | 22.7 | N/A      | N/A  |

Abbreviations: N/A: Not Applicable for controls; WAZ: Weight-for-age-Z-score; LAZ: Length-for-age-Z-score; WLZ: Weight-for-length-Z-score

Web Table 2. Sample Size for Different Infection Categories in Cases and Controls, in Tanzania, 2010-2011

| Pathogen                               | Cases (n=723) |                |               | Controls (n=564) |                |               |
|----------------------------------------|---------------|----------------|---------------|------------------|----------------|---------------|
|                                        | Any infection | Mono-infection | Co-infections | Any infection    | Mono-infection | Co-infections |
| Rotavirus                              | 224           | 71             | 153           | 42               | 15             | 27            |
| Norovirus GII                          | 129           | 47             | 82            | 40               | 14             | 26            |
| Enteric adenovirus                     | 12            | 1              | 11            | 6                | 2              | 4             |
| Non-enteric adenovirus                 | 12            | 3              | 9             | 7                | 3              | 4             |
| <i>Cryptosporidium</i>                 | 113           | 35             | 78            | 17               | 6              | 11            |
| <i>Giardia</i>                         | 24            | 1              | 23            | 34               | 11             | 23            |
| Typical EPEC                           | 43            | 14             | 29            | 16               | 3              | 13            |
| Atypical EPEC                          | 139           | 23             | 116           | 107              | 39             | 68            |
| STh-ETEC                               | 51            | 8              | 43            | 13               | 5              | 8             |
| LT-ETEC                                | 48            | 5              | 43            | 39               | 9              | 30            |
| EAEC                                   | 281           | 50             | 231           | 181              | 86             | 95            |
| <i>Shigella</i> spp./EIEC              | 53            | 13             | 40            | 12               | 3              | 9             |
| <i>Salmonella</i> spp.                 | 11            | 2              | 9             | 3                | 3              | 0             |
| <i>C.jejuni</i>                        | 39            | 2              | 37            | 26               | 8              | 18            |
| <b>Exclusive dual infections</b>       |               |                |               |                  |                |               |
| Rotavirus + <i>Giardia</i>             | N/A           | N/A            | 8             | N/A              | N/A            | 1             |
| Rotavirus + Norovirus GII              | N/A           | N/A            | 18            | N/A              | N/A            | 4             |
| Rotavirus + <i>Shigella</i> Spp./EIEC  | N/A           | N/A            | 8             | N/A              | N/A            | 1             |
| Rotavirus + <i>C.jejuni</i>            | N/A           | N/A            | 18            | N/A              | N/A            | 2             |
| <i>Cryptosporidium</i> + Norovirus GII | N/A           | N/A            | 6             | N/A              | N/A            | 2             |
| <i>Cryptosporidium</i> + Atypical EPEC | N/A           | N/A            | 25            | N/A              | N/A            | 2             |
| Norovirus GII + EAEC                   | N/A           | N/A            | 53            | N/A              | N/A            | 11            |
| Norovirus GII + Typical EPEC           | N/A           | N/A            | 3             | N/A              | N/A            | 2             |

Abbreviations: N/A not applicable in that category

Web Table 3. Clinical Characteristics of Mono-infection (N=263) and Co-infections (N=365) for Children Admitted with Diarrhoea in Dar es Salaam, Tanzania, 2010-2011

| Clinical characteristic           | Mono-infection |      | Co-infections |      | P value |
|-----------------------------------|----------------|------|---------------|------|---------|
|                                   | n              | %    | n             | %    |         |
| <b>Type of diarrhoea</b>          |                |      |               |      |         |
| Acute diarrhoea                   | 227            | 86.3 | 332           | 91.0 | 0.06    |
| Persistent diarrhoea              | 36             | 13.7 | 33            | 9.0  |         |
| <b>Dehydration</b>                |                |      |               |      |         |
| None to moderate                  | 206            | 78.3 | 279           | 76.4 | 0.58    |
| Severe                            | 57             | 21.7 | 86            | 23.6 |         |
| <b>Presence of blood in stool</b> | 8              | 3.0  | 17            | 4.7  | 0.31    |
| <b>Malnutrition</b>               |                |      |               |      |         |
| Underweight                       | 157            | 59.7 | 204           | 55.9 | 0.57    |
| Stunting                          | 181            | 68.8 | 244           | 66.8 | 0.60    |
| Wasting                           | 84             | 31.9 | 104           | 28.5 | 0.35    |
| <b>Death (n=40)<sup>a</sup></b>   | 18\278         | 6.7  | 22\253        | 8.7  | 0.42    |
| <b>HIV status <sup>b</sup></b>    |                |      |               |      |         |
| HIV negative(n=273)               | 143\154        | 92.9 | 130\143       | 90.9 | 0.54    |
| HIV positive (n=24)               | 11\154         | 7.1  | 13\143        | 9.1  |         |

**Footnote:** <sup>a</sup> Number of children who died and pathogens identified; <sup>b</sup> total number of children differs from the rest because it represents children who tested for HIV
